# Supplementary material
Source: Springer Nature journal article supplement (https://www.springermedizin.de/resource/supplementary/12885_2012_3917_MOESM5_ESM.pdf/9464680)
Supplement: MOESM5 [file 9464680]

**Untransfected**      **Scramble siRNA**      **Notch1 transfected**

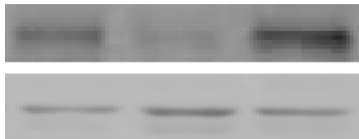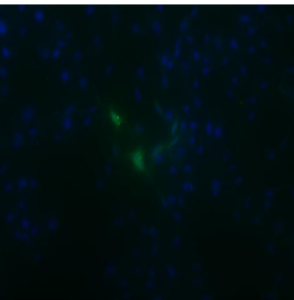

**Untransfected**

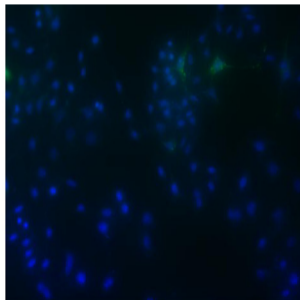

**Scramble siRNA**

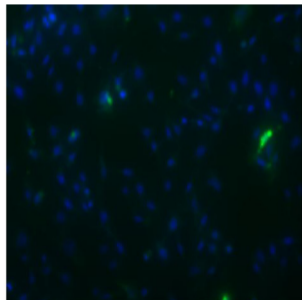

**Notch1 transfected**
